# Supplementary material
Source: ML conference proceedings conference paper supplement (https://openreview.net/forum?id=DASBtzdyq5)

**Target Context Distribution**

$$\varphi : \Delta(\mathcal{C})$$

**Labeled CMDP**

$$\bar{\mathcal{M}}^L = \langle S, A, \mathcal{C}, M^L \rangle$$

**Reward Machine**

$$\mathcal{R} = \langle Q, q_I, 2^{\mathcal{P}}, O, \delta_q, \delta_r \rangle$$

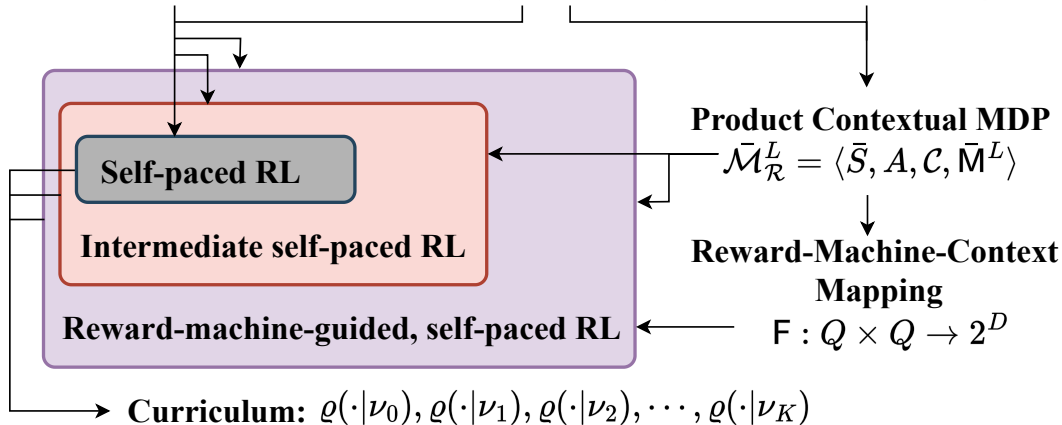

Supplement: supplementary_material [file attachment]
