# Supplementary material
Source: ML conference proceedings conference paper supplement (https://openreview.net/forum?id=DASBtzdyq5)

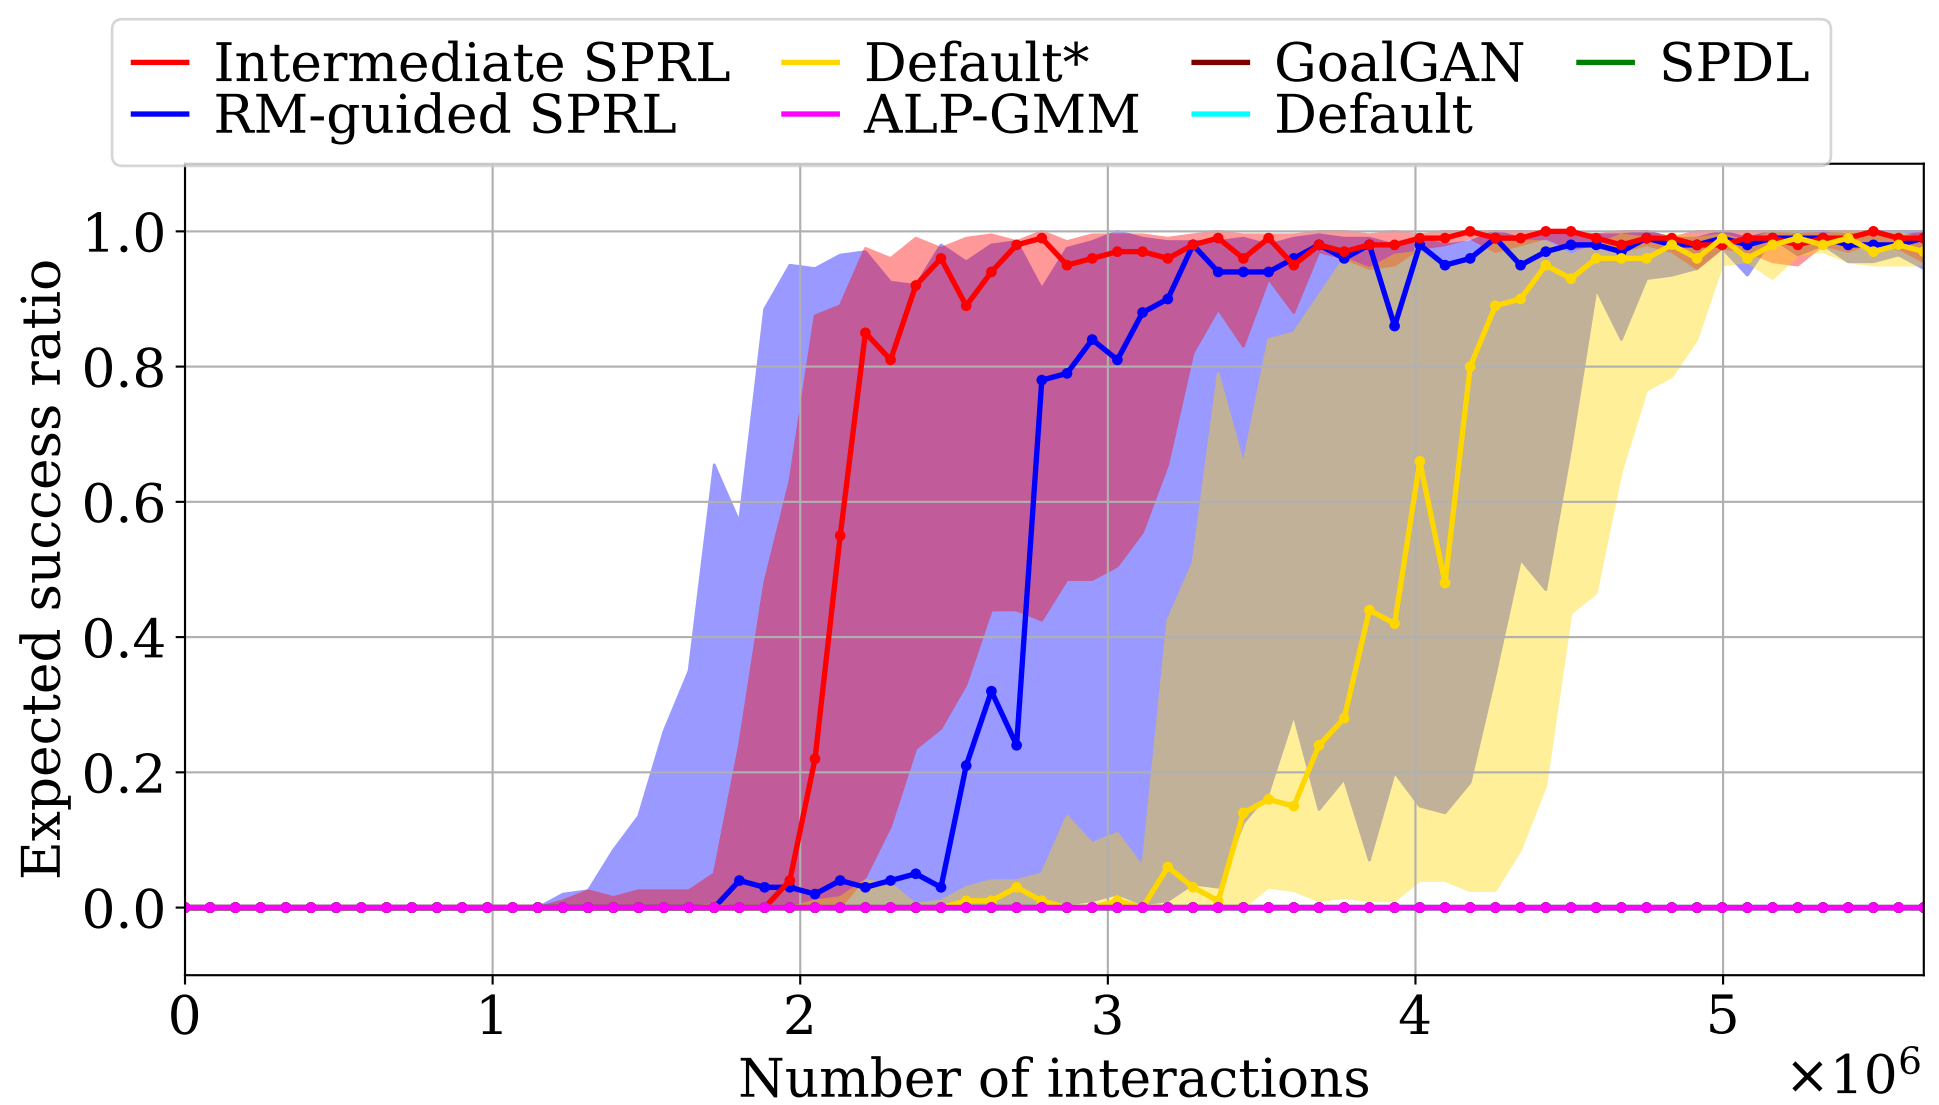

Supplement: supplementary_material [file attachment]

Start



Door 1



Box



Door 2



Goal



Supplement: supplementary_material [file attachment]

Sample context  $c = (c[1], c[2])$   
 $c \sim p(c|\nu) = \mathcal{N}((\mu_1, \mu_2), \text{diag}(\sigma_1^2, \sigma_2^2))$

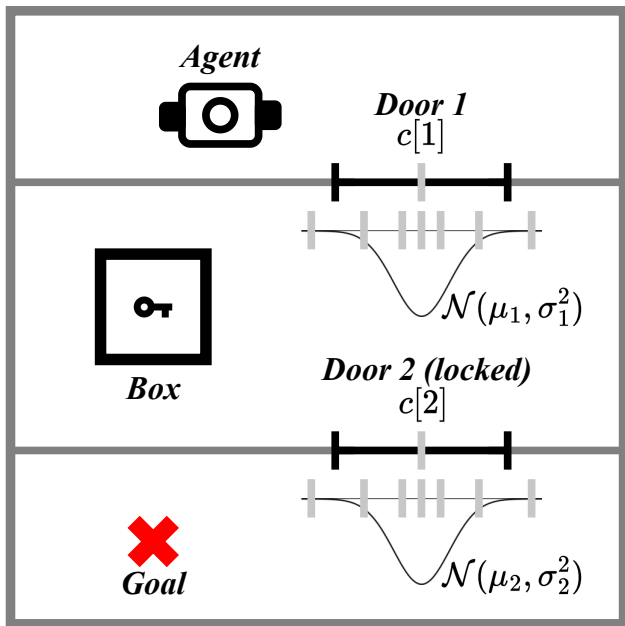

Supplement: supplementary_material [file attachment]

Default\* Intermediate SPRL GoalGAN SPDL  
RM-guided SPRL ALP-GMM Default

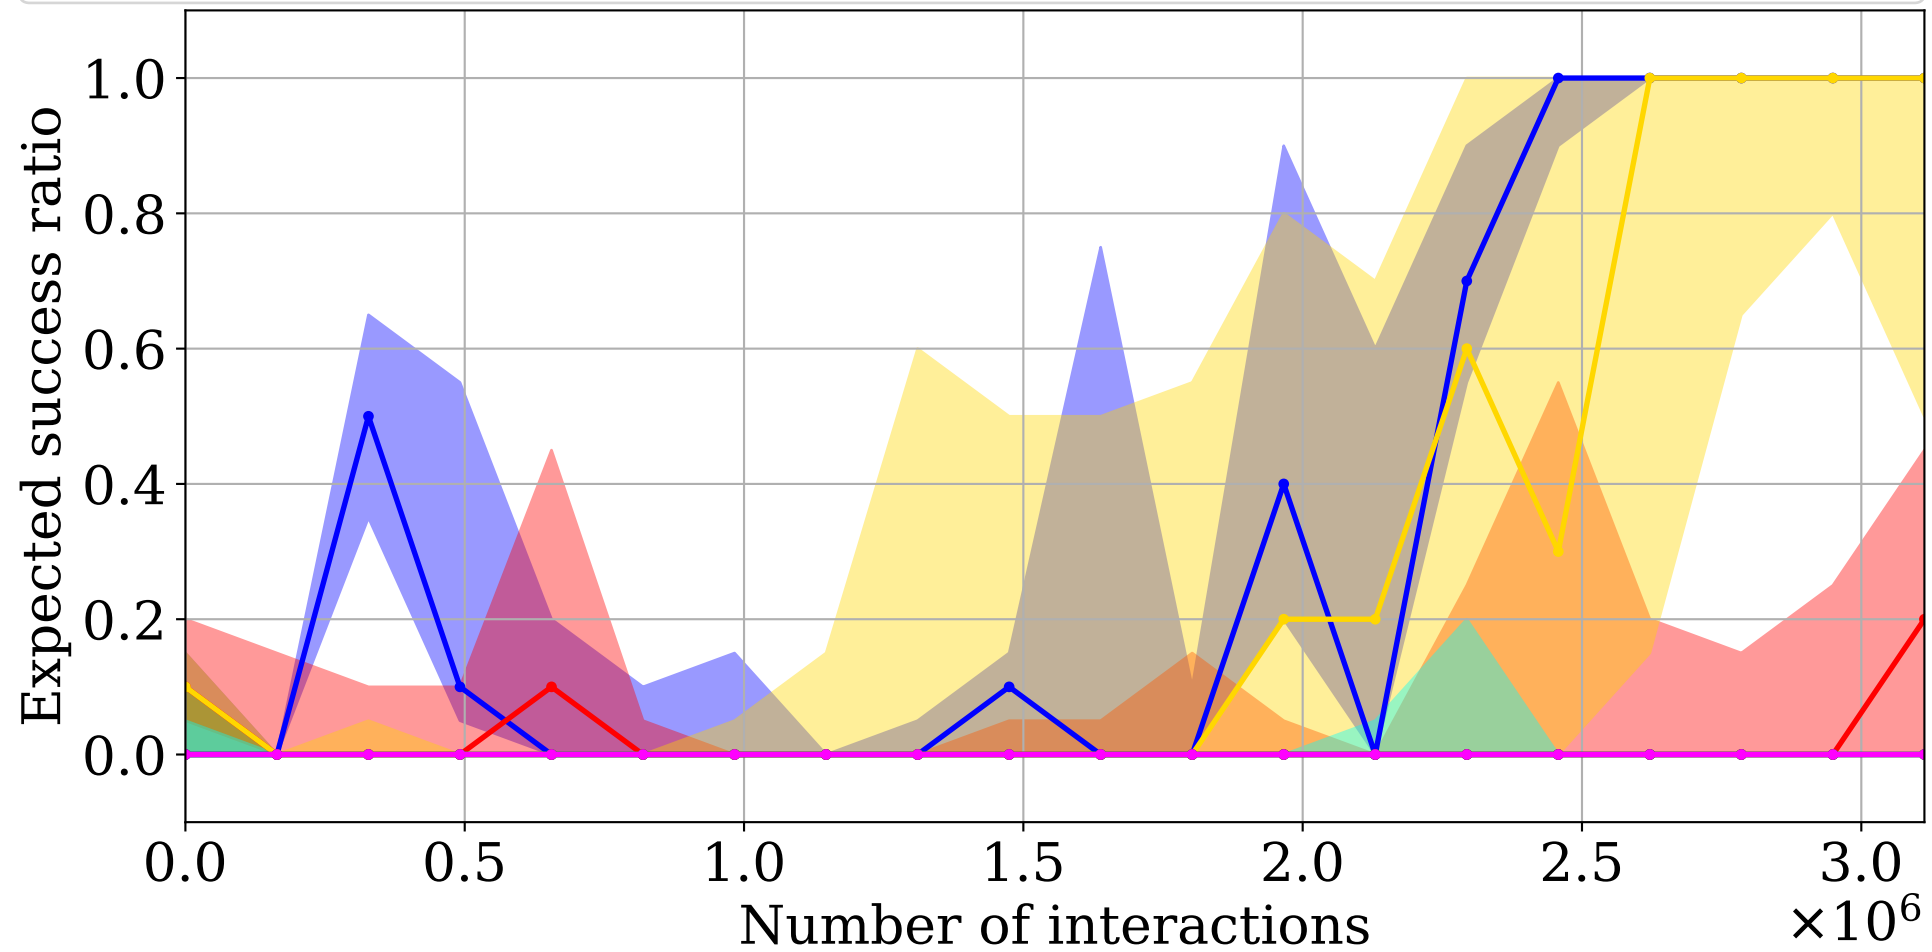

Supplement: supplementary_material [file attachment]

SPDL      RM-guided SPRL  
Intermediate SPRL

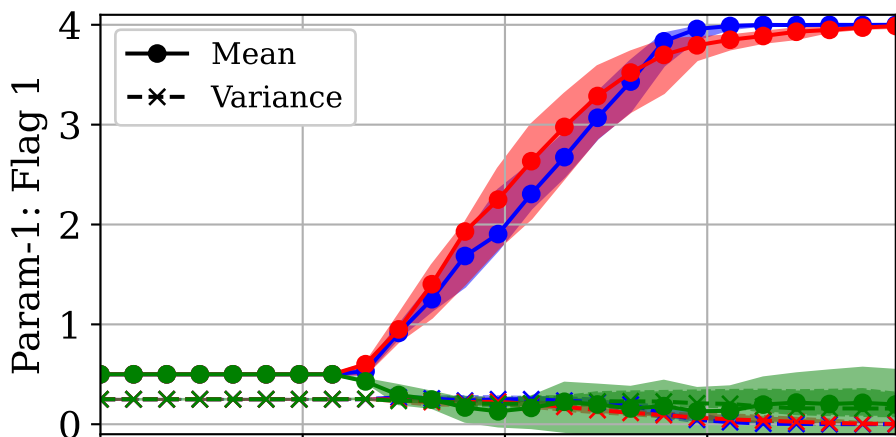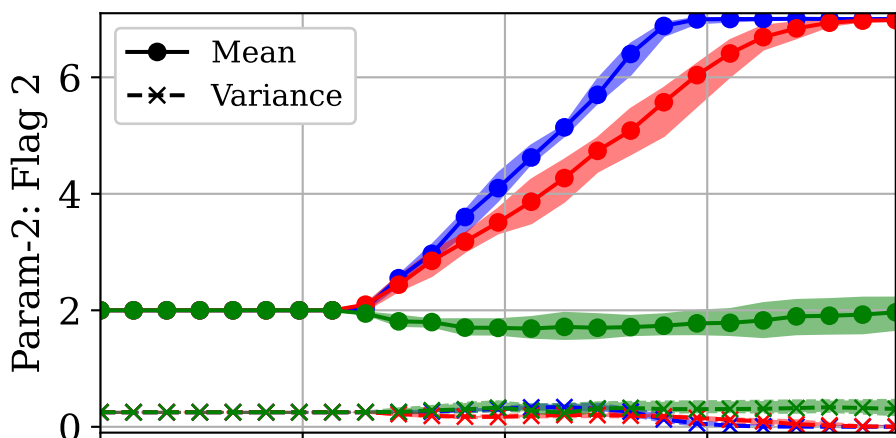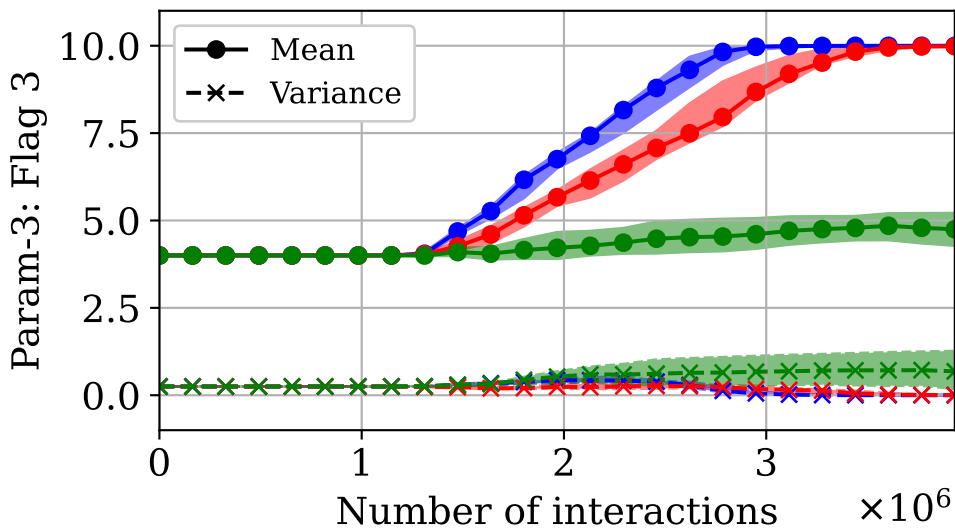

Supplement: supplementary_material [file attachment]

SPDL RM-guided SPRL  
Intermediate SPRL

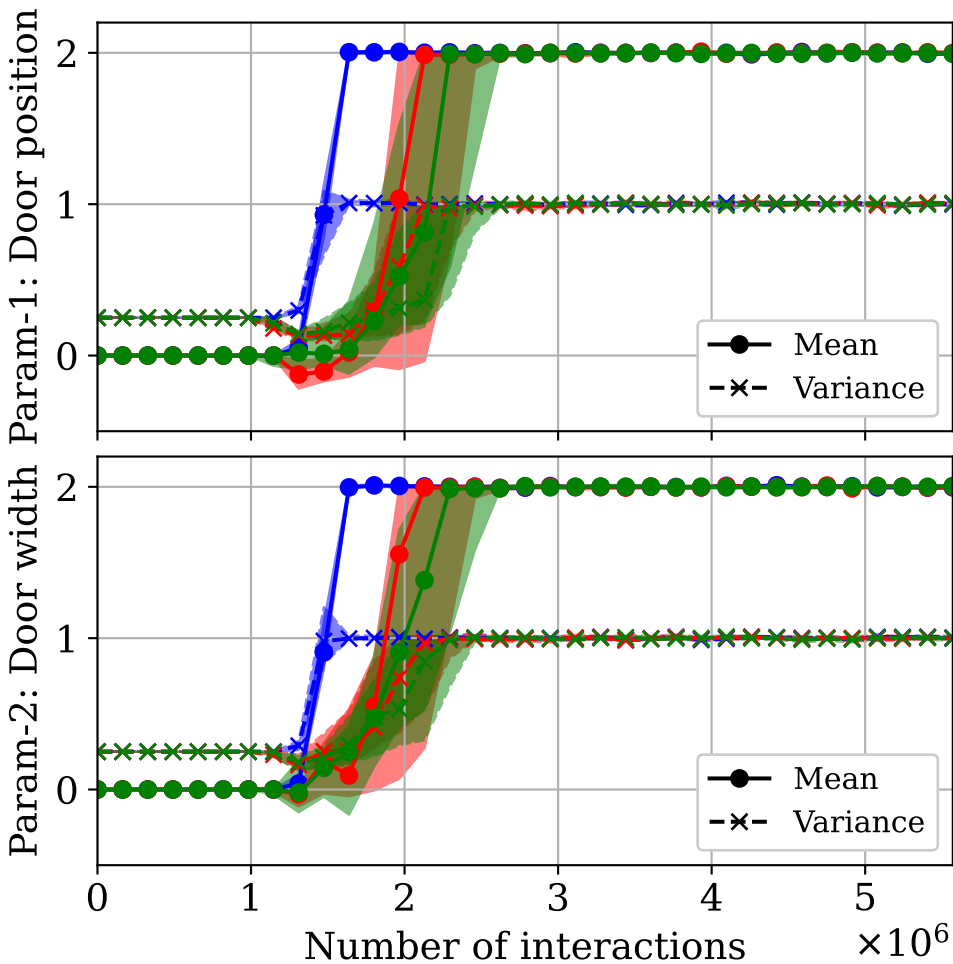

Supplement: supplementary_material [file attachment]

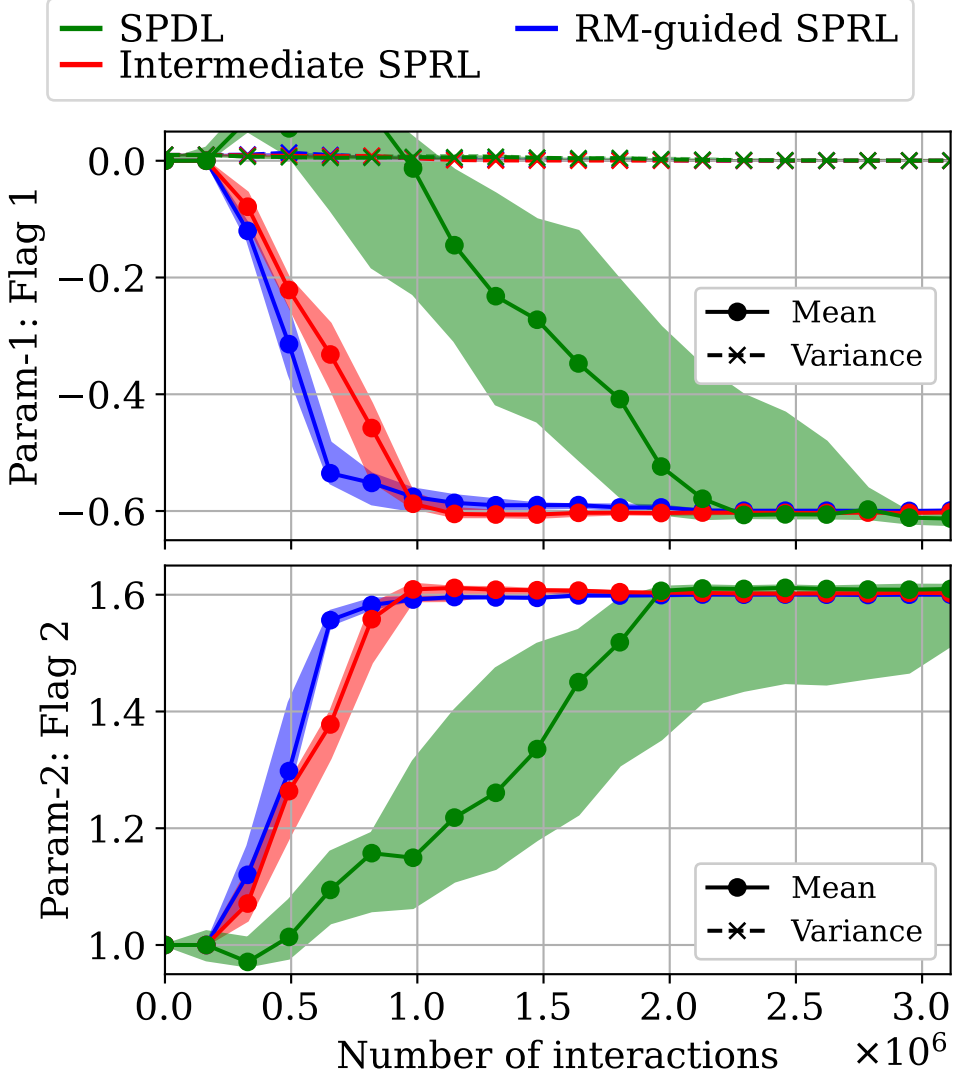

Supplement: supplementary_material [file attachment]

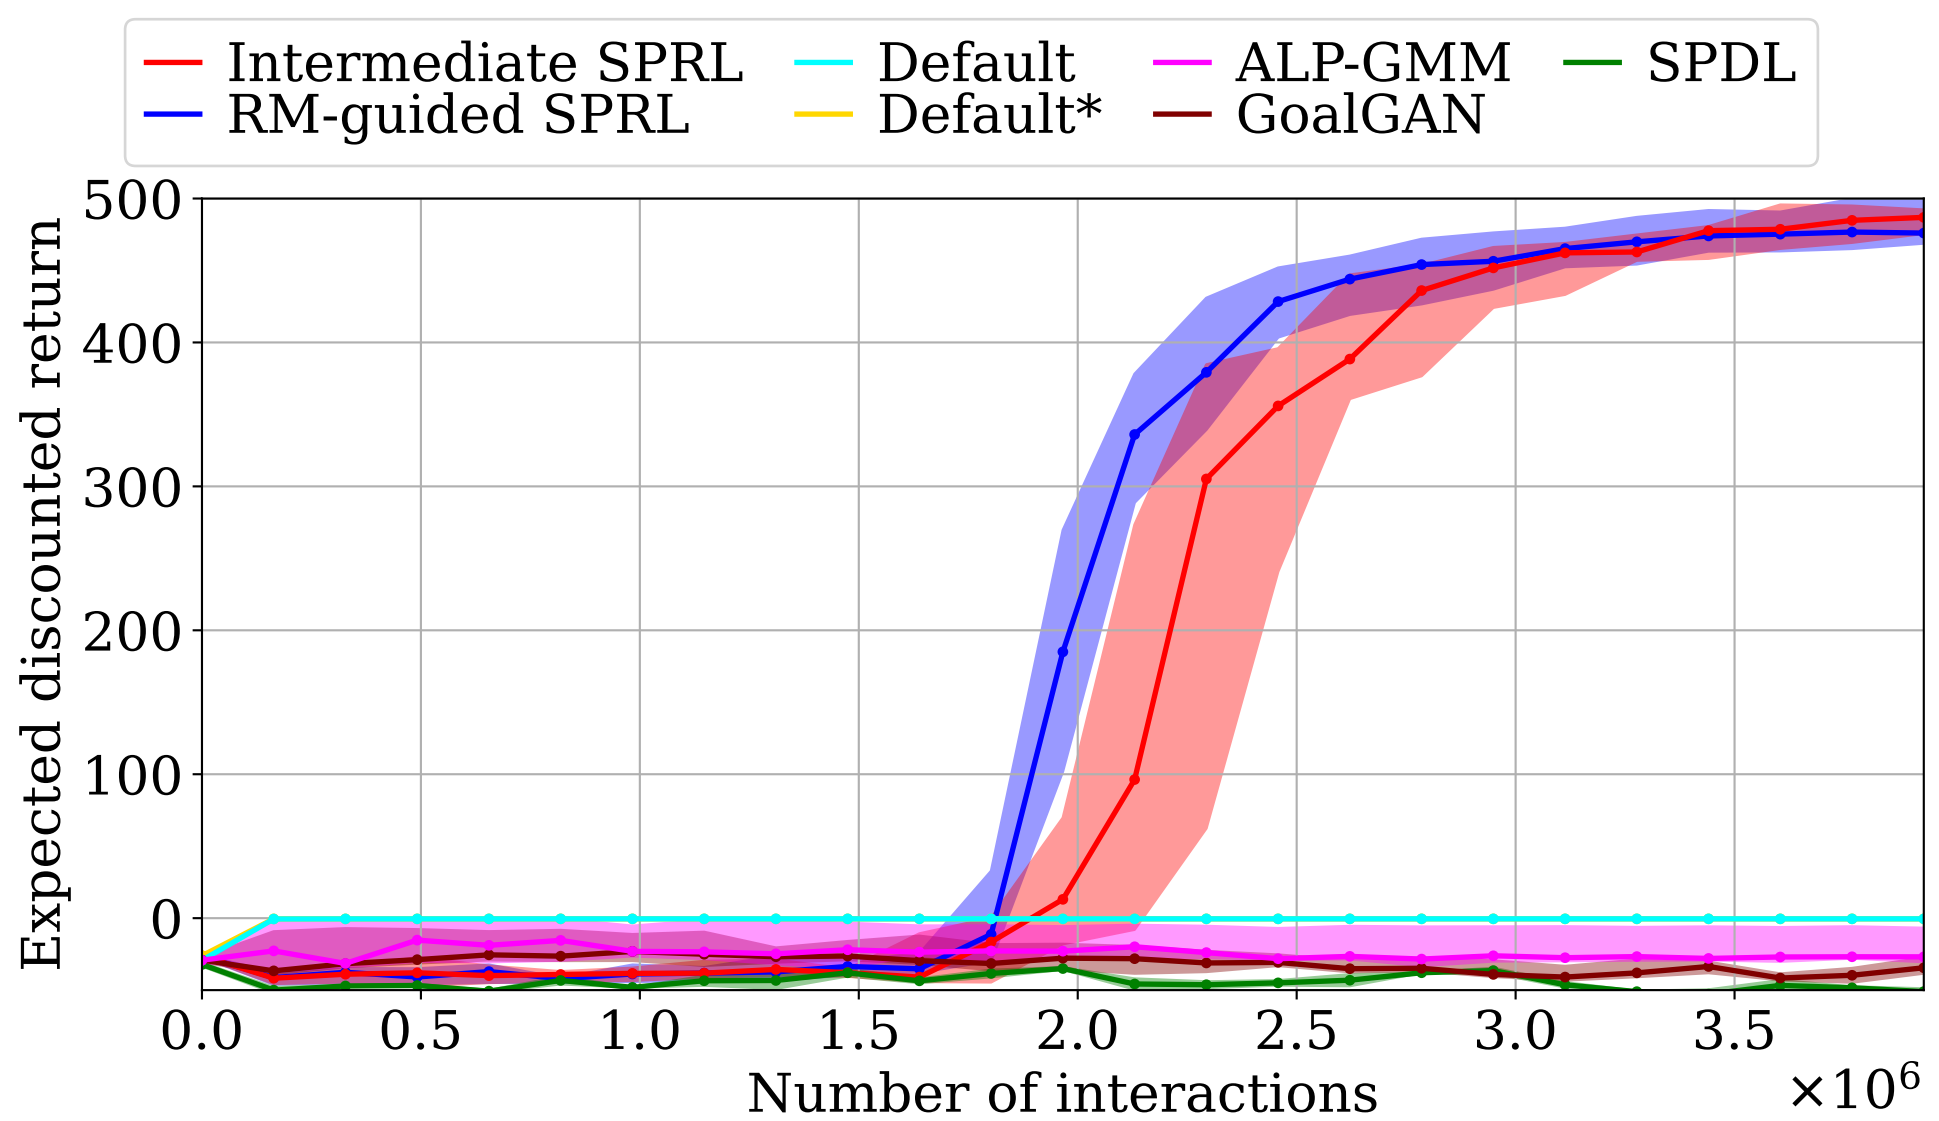

Supplement: supplementary_material [file attachment]

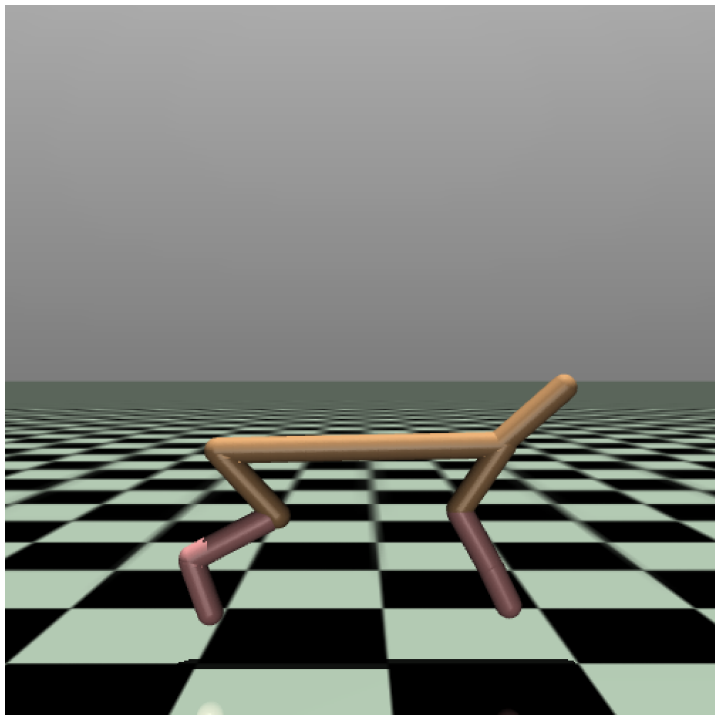

Supplement: supplementary_material [file attachment]

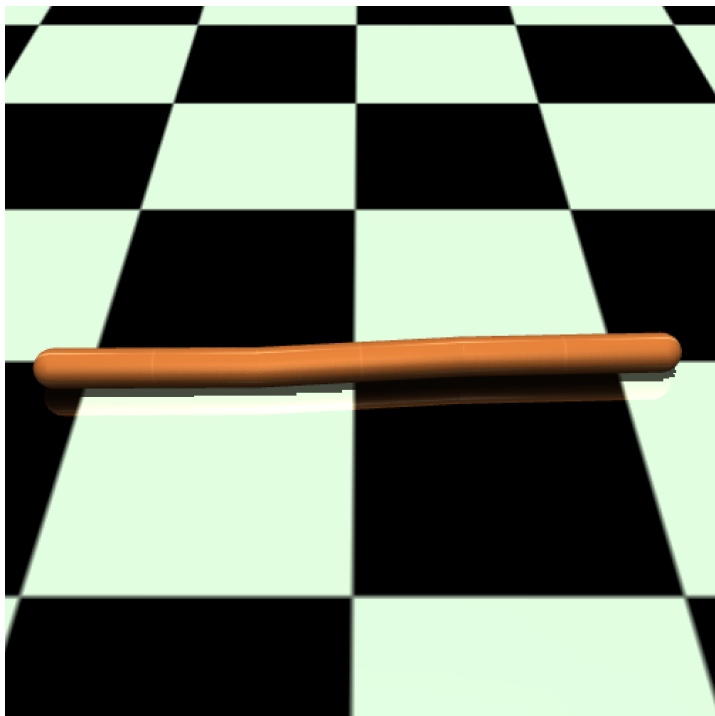

Supplement: supplementary_material [file attachment]

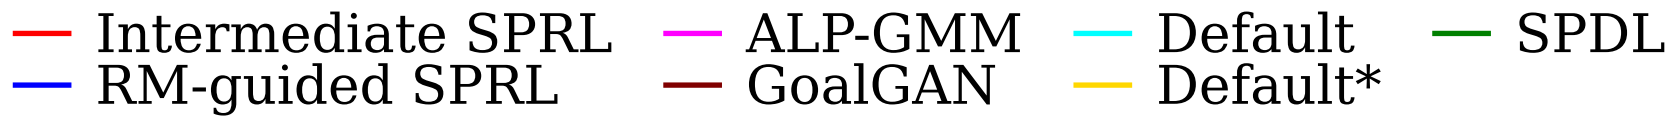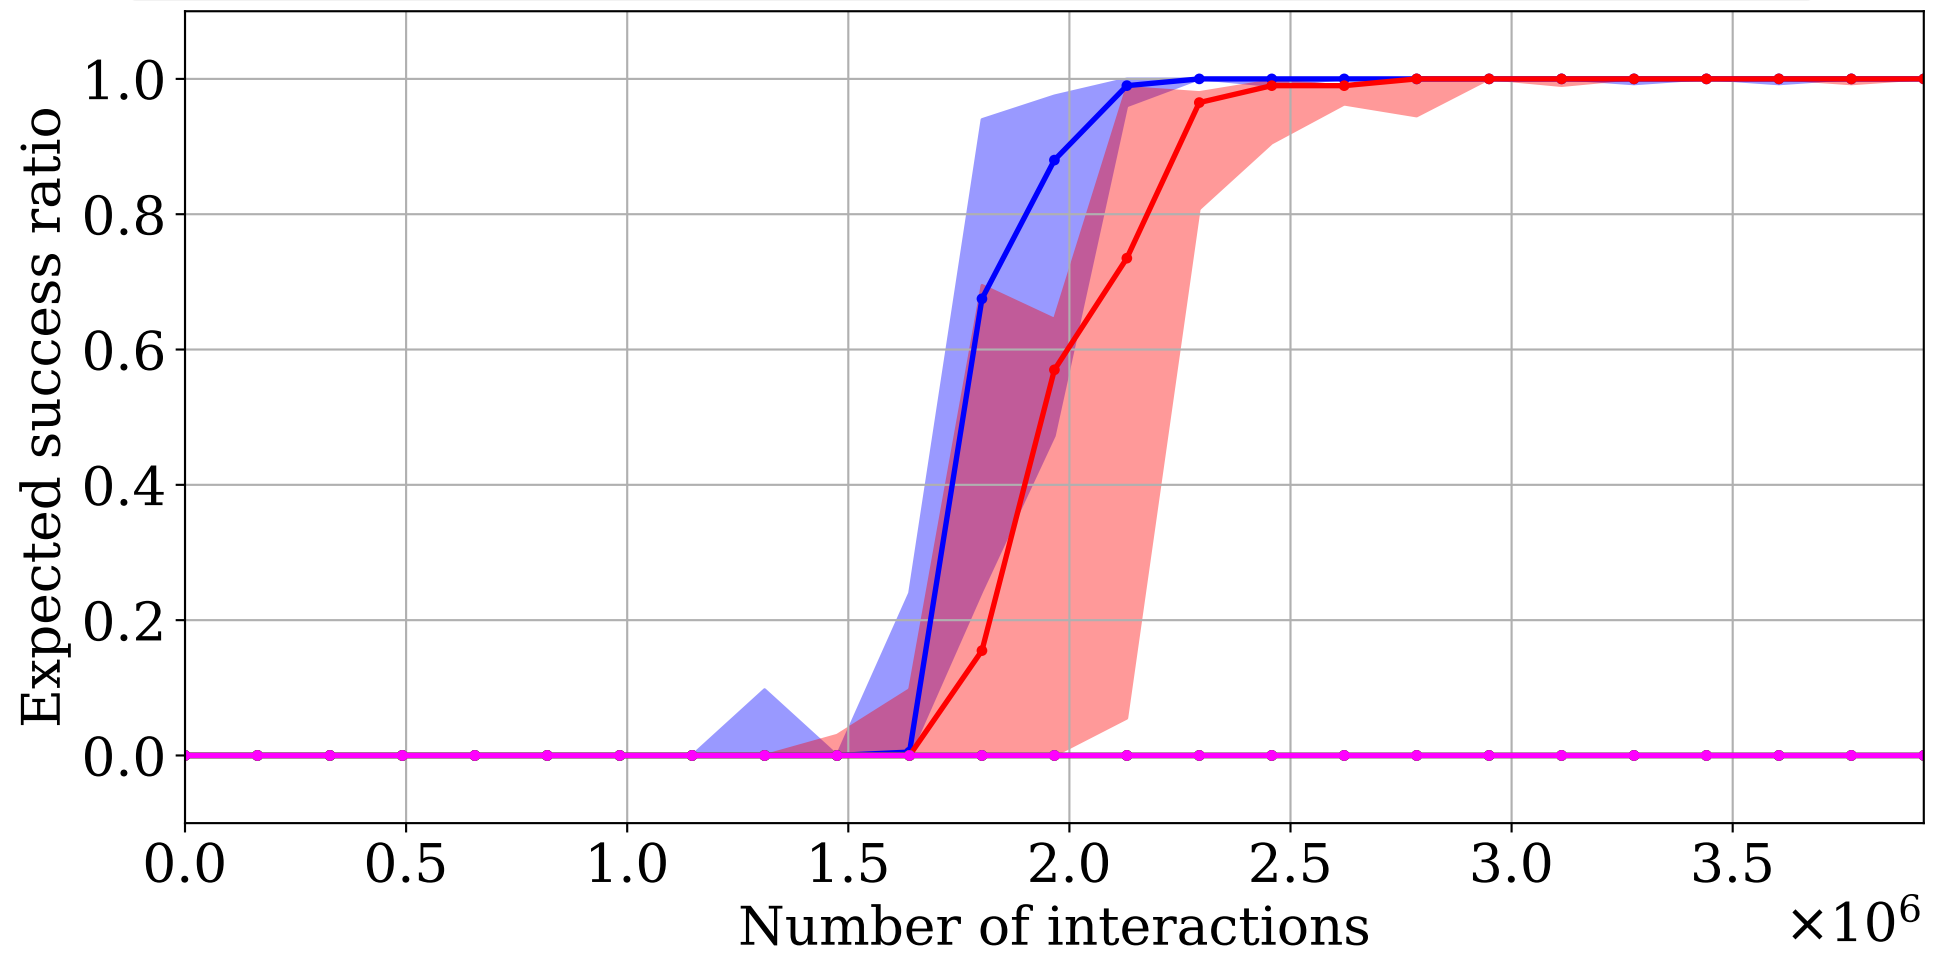

Supplement: supplementary_material [file attachment]

RM-guided SPRL   Intermediate SPRL   SPDL   GoalGAN  
Default\*   Default   ALP-GMM

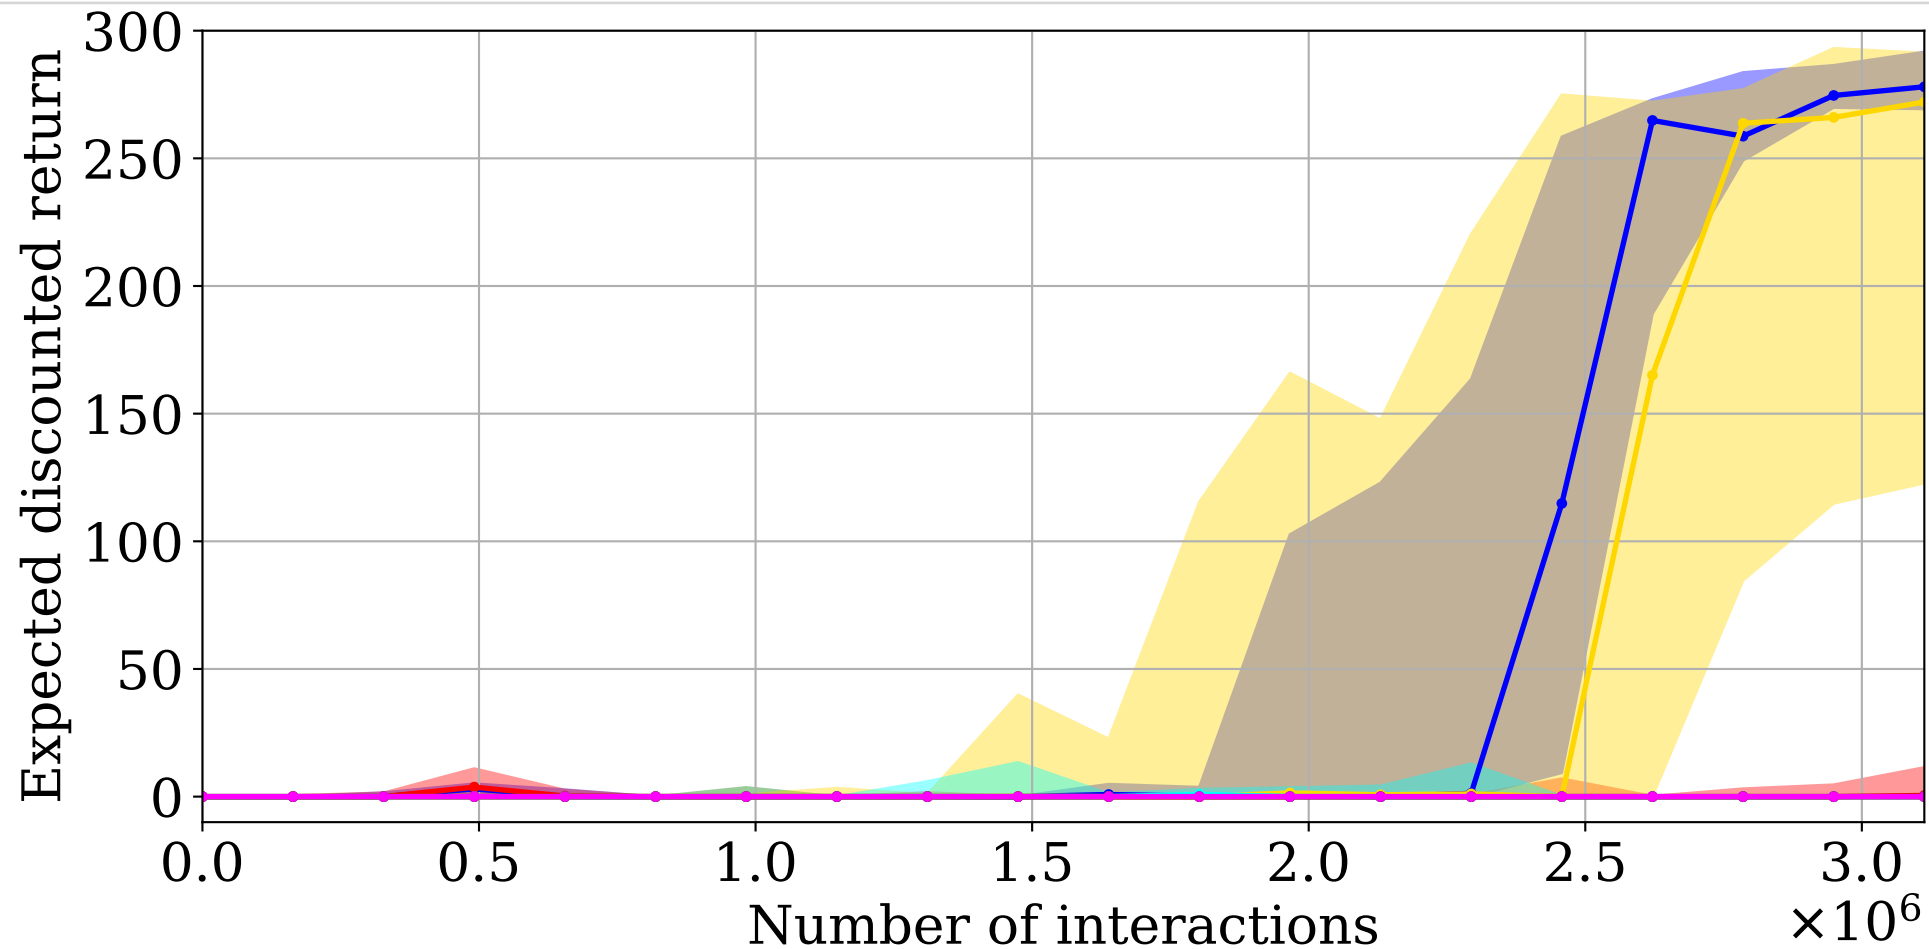

Supplement: supplementary_material [file attachment]

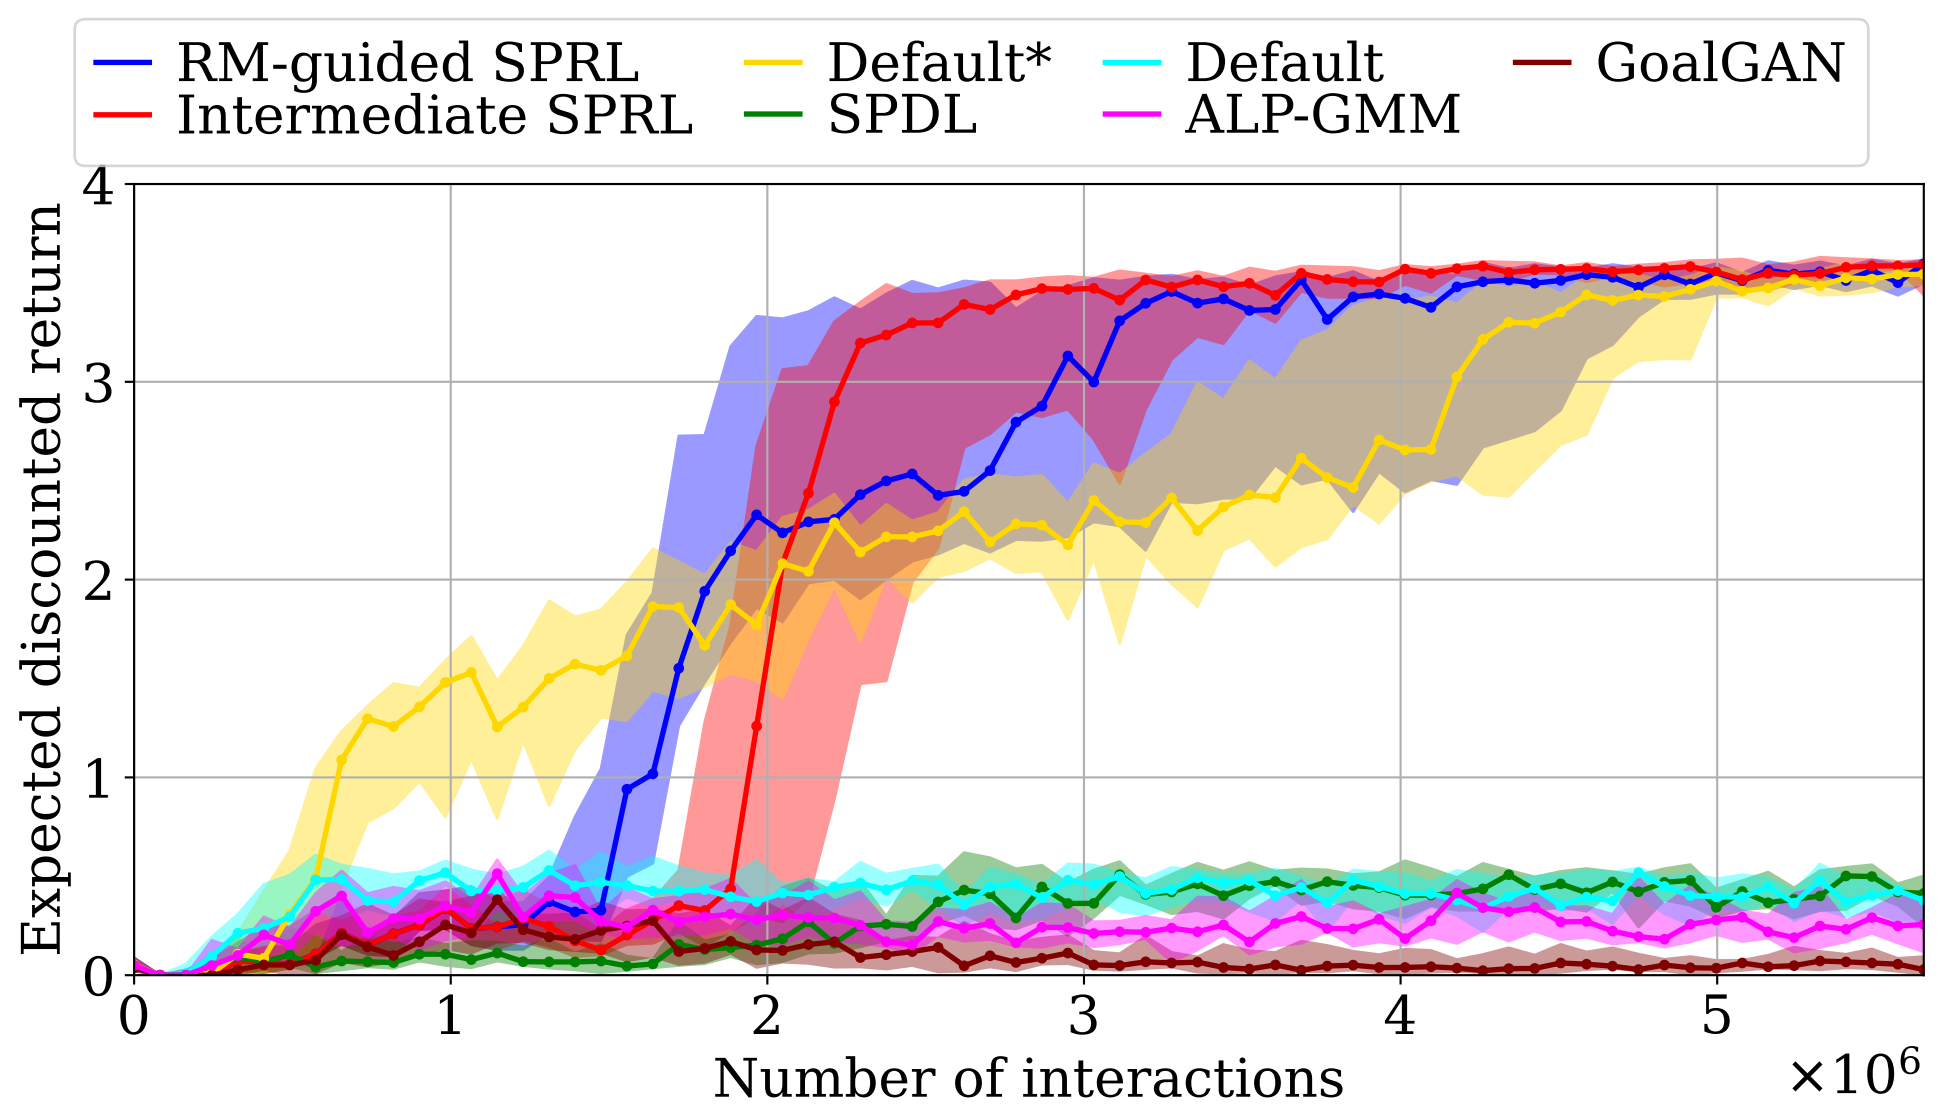

Supplement: supplementary_material [file attachment]
